# Supplementary material for: Effectiveness of a Decision Aid Plus Standard Care in Surgical Management Among Patients With Early Breast Cancer: A Randomized Clinical Trial
Source: PubMed Central journal article supplement (PMC10546236; doi:10.1001/jamanetworkopen.2023.35941), 2023-10-02
Supplement: jamanetwopen-e2335941-s003.pdf [file jamanetwopen-e2335941-s003.pdf]

## Data Sharing Statement

Joshi. Effectiveness of a Decision Aid Plus Standard Care in Surgical Management Among Patients With Early Breast Cancer. *JAMA Netw Open*. Published October 02, 2023.  
doi:10.1001/jamanetworkopen.2023.35941

### Data

**Data available:** Yes

**Data types:** Deidentified participant data

**How to access data:** PI email ID

**When available:** With publication

### Supporting Documents

**Document types:** Other (please specify)

**Additional Information:** Original protocol

**How to access documents:** Uploaded with submission

**When available:** With publication

### Additional Information

**Who can access the data:** Researchers

**Types of analyses:** Meta-analysis, systematic review

**Mechanisms of data availability:** After signed data access agreement
